# Supplementary material for: Structure and magnetism of two chair-shaped hexanuclear dysprosium(iii) complexes exhibiting slow magnetic relaxation
Source: Royal Society of Chemistry journal article supplement (doi:10.1039/c7ra11378a), 2018-01-01
Supplement: c7ra11378a1.pdf [file c7ra11378a1.pdf]

## Electronic Supplementary Information (ESI)

### Structure and Magnetism of Two Chair-Shaped Hexanuclear Dysprosium(III) Complexes Exhibiting Slow Magnetic Relaxation

Zi-Yuan Liu <sup>a</sup>, Hua-Hong Zou <sup>a,\*</sup>, Rong Wang <sup>a</sup>, Man-Sheng Chen <sup>a</sup>, Fu-Pei Liang <sup>a,b,\*</sup>

<sup>a</sup>State Key Laboratory for Chemistry and Molecular Engineering of Medicinal Resources, School of Chemistry & Pharmacy of Guangxi Normal University, Guilin 541004, P. R. China, E-mail: gxnuchem@foxmail.com

<sup>b</sup>Guangxi Key Laboratory of Electrochemical and Magnetochemical Functional Materials, College of Chemistry and Bioengineering, Guilin University of Technology, Guilin 541004, P. R. China, E-mail: fliangoffice@yahoo.com

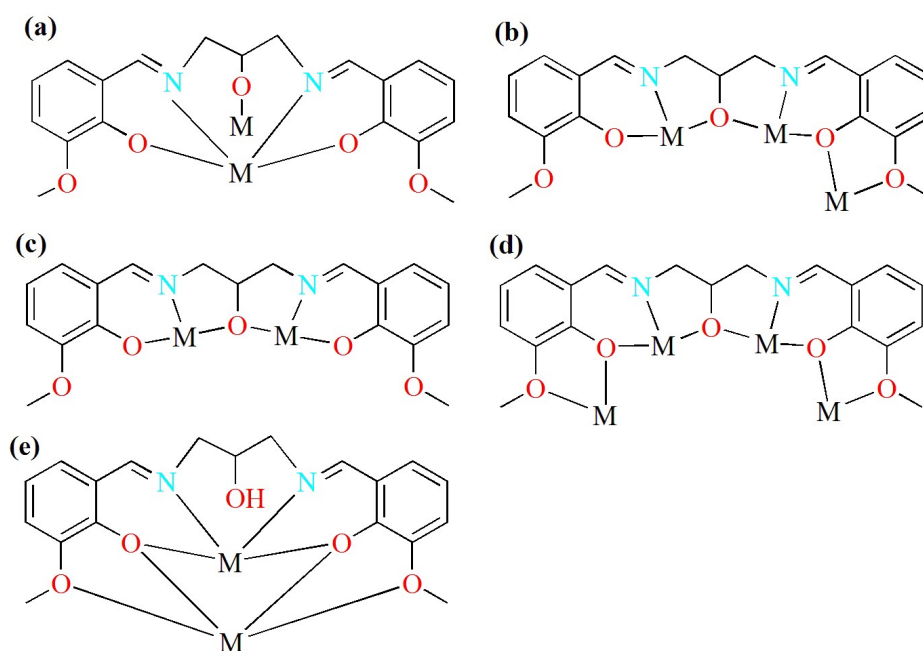

Scheme S1. The crystallographically up-to-date established coordination modes of the  $H_3L^1$  ligand: (a)  $\mu_2-L^1-\kappa^5 O^2, N^1, N^2, O^4, O^3$ ; (b)  $\mu_3-L^1-\kappa^8 O^2, N^1, O^3, O^3, N^2, O^4, O^4, O^5$ ; (c)  $\mu_2-L^1-\kappa^6 O^2, N^1, O^3, O^3, N^2, O^4$ ; (d)  $\mu_4-L^1-\kappa^{10} O^1, O^2, O^2, N^1, O^3, O^3, N^2, O^4, O^4, O^5$ ; (e)  $\mu_2-L^1-\kappa^8 O^1, O^2, O^4, O^5, O^2, O^4, N^1, N^2$ .

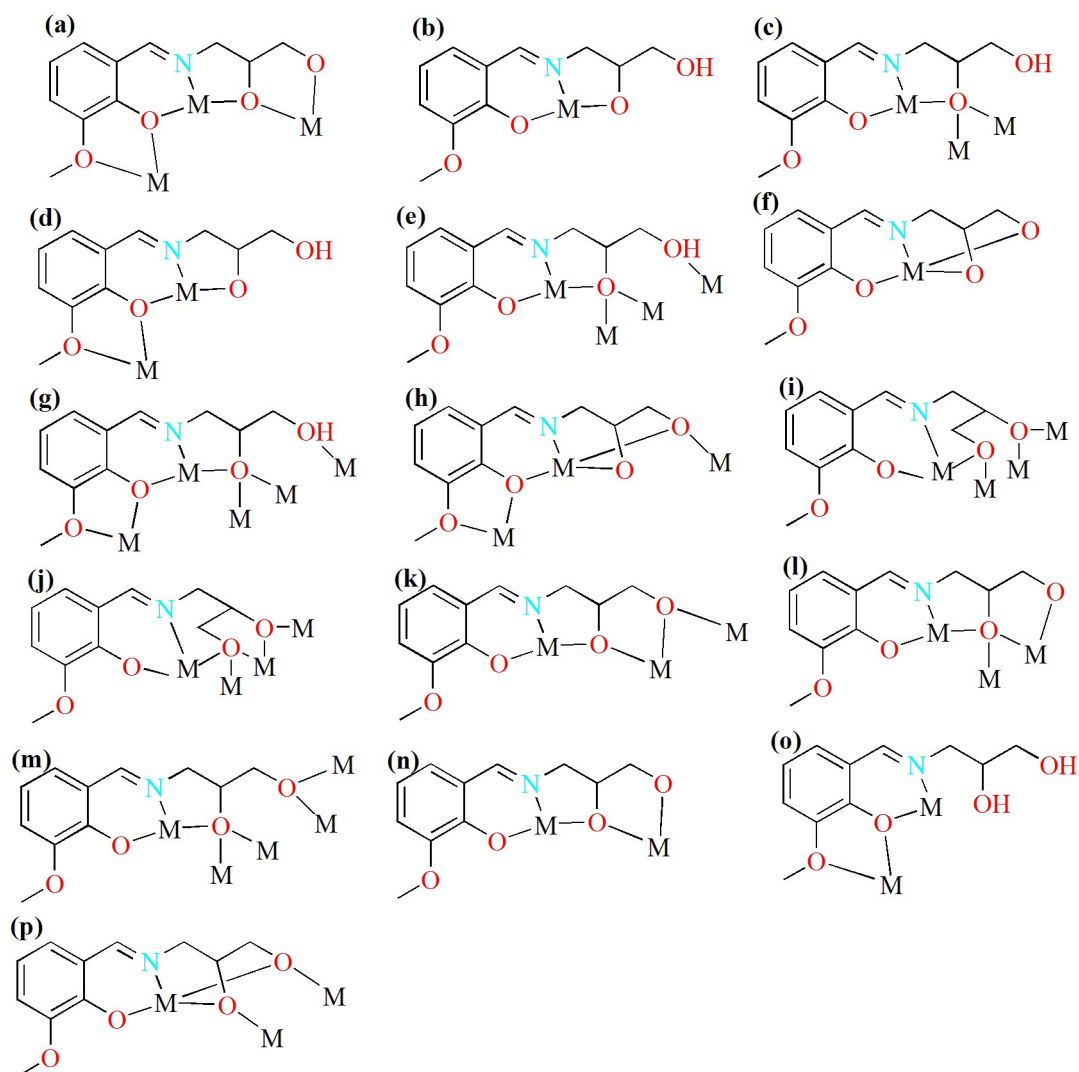

Scheme S2. The crystallographically up-to-date established coordination modes of the  $H_3L^2$  ligands: (a)  $\mu_3$ - $L^2$ - $\kappa^7O^1,O^2:O^2,N^1,O^3:O^3,O^4$ ; (b)  $L^2$ - $\kappa^3O^2,N^1,O^3$ ; (c)  $\mu_3$ - $L^2$ - $\kappa^5O^2,N^1,O^3:O^3:O^3$ ; (d)  $\mu_2$ - $L^2$ - $\kappa^5O^1,O^2:O^2,N^1,O^3$ ; (e)  $\mu_4$ - $L^2$ - $\kappa^6O^2,N^1,O^3:O^3:O^3,O^4$ ; (f)  $L^2$ - $\kappa^4O^2,N^1,O^3,O^4$ ; (g)  $\mu_5$ - $L^2$ - $\kappa^8O^1,O^2:O^2,N^1,O^3:O^3:O^3,O^4$ ; (h)  $\mu_3$ - $L^2$ - $\kappa^7O^1,O^2:O^2,N^1,O^3,O^4,O^4$ ; (i)  $\mu_4$ - $L^2$ - $\kappa^6O^2,N^1,O^4:O^3:O^3:O^4$ ; (j)  $\mu_4$ - $L^2$ - $\kappa^7O^2,N^1,O^4:O^3:O^3,O^4,O^4$ ; (k)  $\mu_3$ - $L^2$ - $\kappa^6O^2,N^1,O^3:O^3,O^4,O^4$ ; (l)  $\mu_3$ - $L^2$ - $\kappa^6O^2,N^1,O^3:O^3:O^3,O^4$ ; (m)  $\mu_5$ - $L^2$ - $\kappa^7O^2,N^1,O^3:O^3:O^3,O^4,O^4$ ; (n)  $\mu_2$ - $L^2$ - $\kappa^5O^2,N^1,O^3:O^3,O^4$ ; (o)  $\mu_2$ - $L^2$ - $\kappa^4O^1,O^2:O^2,N^1$ ; (p)  $\mu_3$ - $L^2$ - $\kappa^6O^2,N^1,O^3,O^4:O^3:O^4$ .

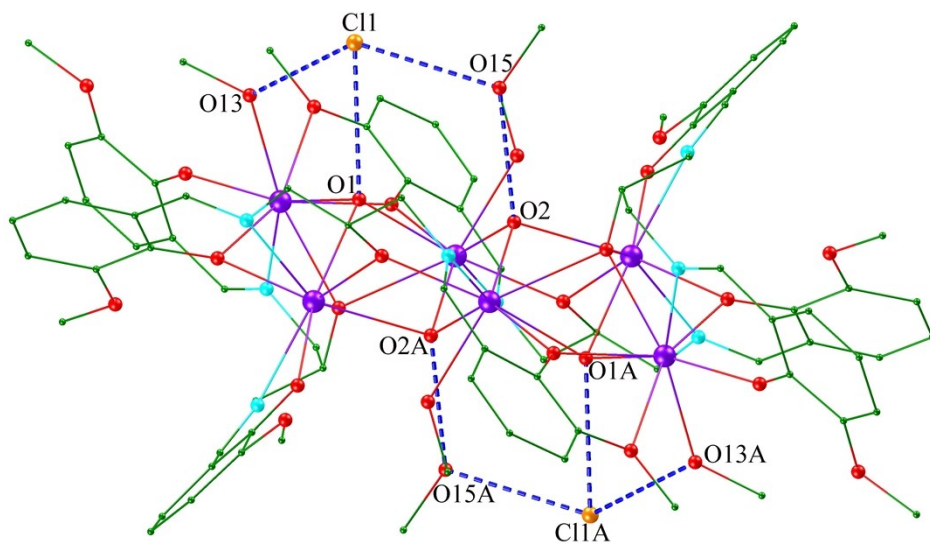

Figure S1. The hydrogen-bonded interaction of complex **1**, Color scheme: Dy, purple; O, red; N, light blue; C, green; Cl, light yellow; Hydrogen atoms and part of solvents are omitted for clarity.

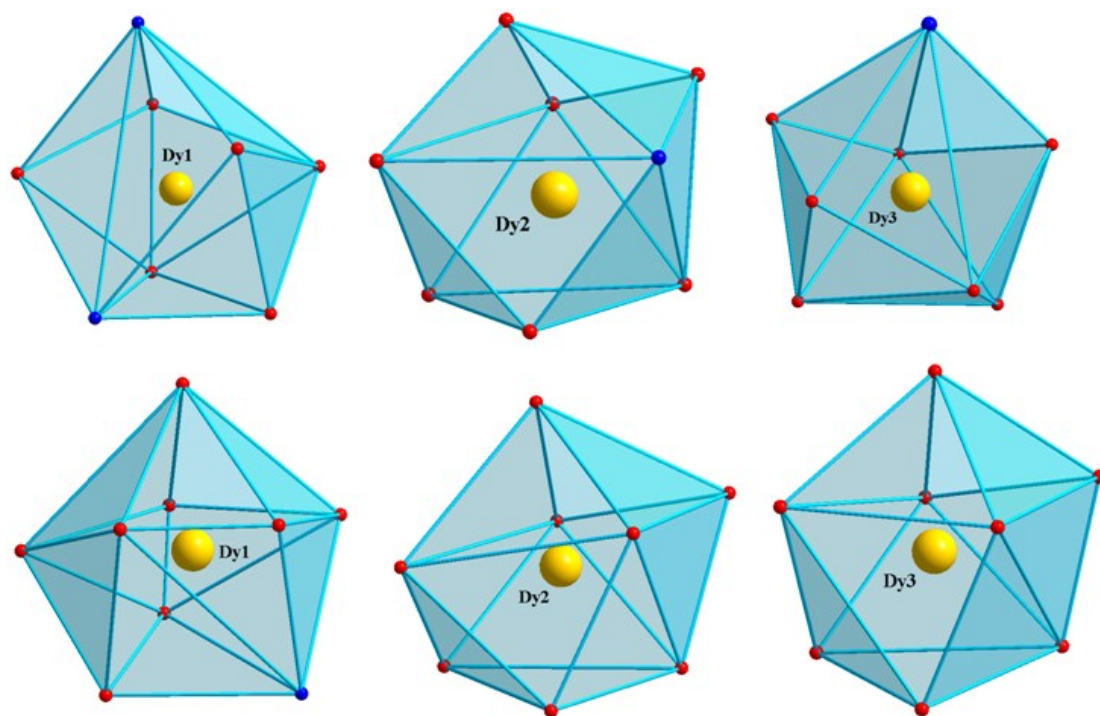

Figure S2. The coordination polyhedra of the Dy<sup>III</sup> ions in complexes **1** (top) and **2** (down).

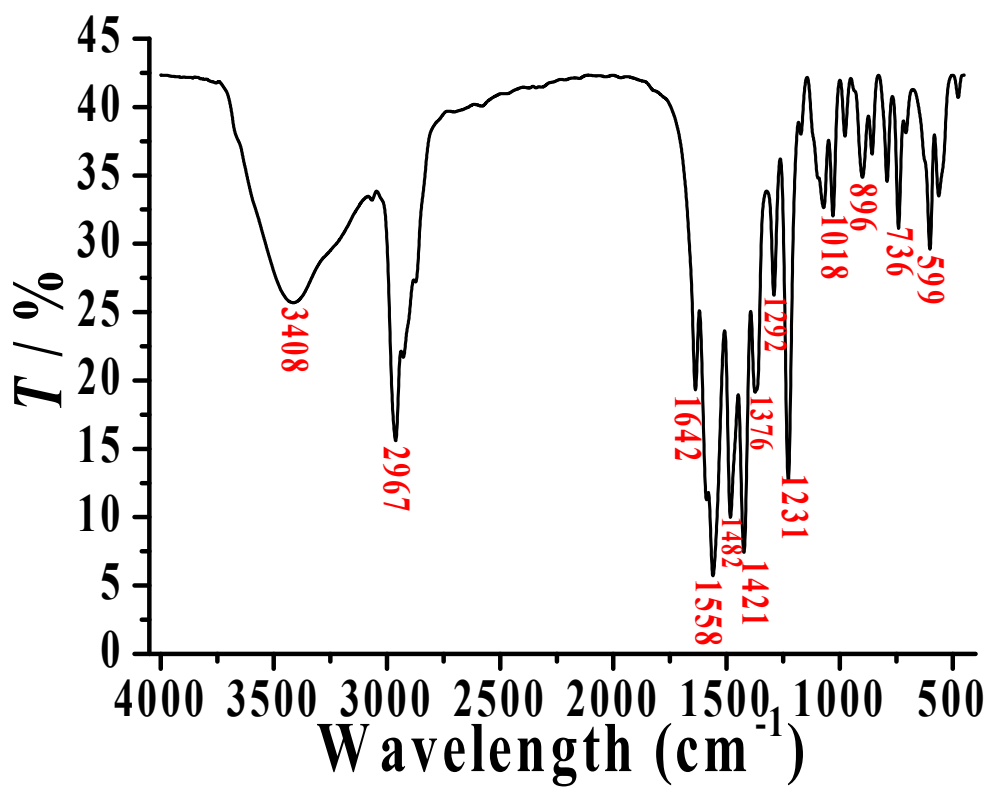

Figure S3. FT-IR spectrum of complex 1.

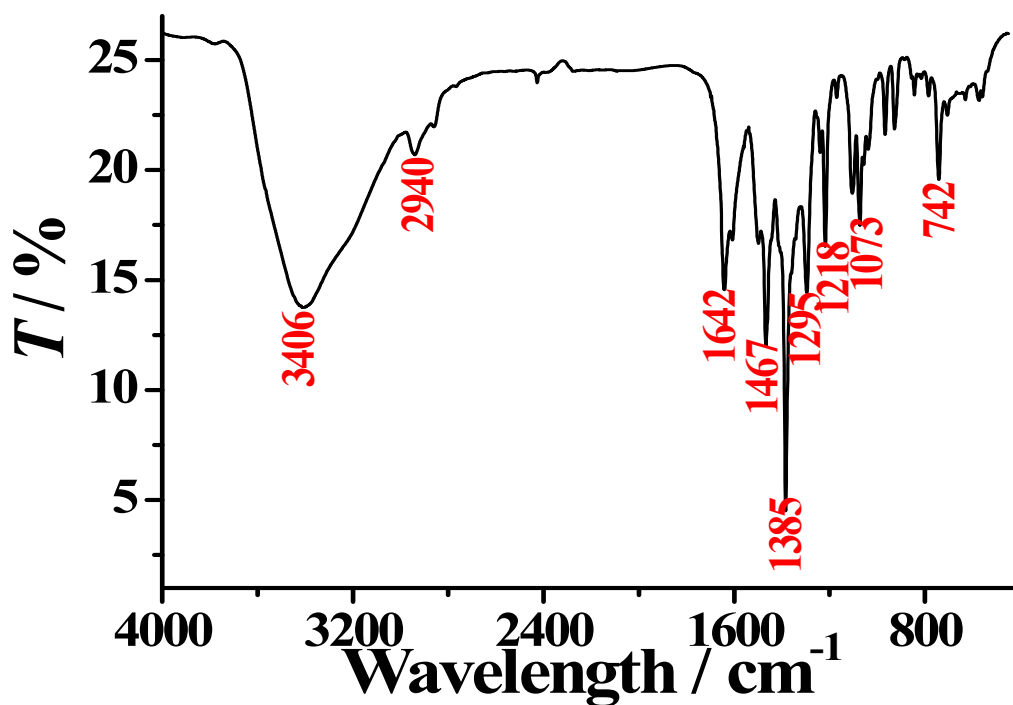

Figure S4. FT-IR spectrum of complex 2.

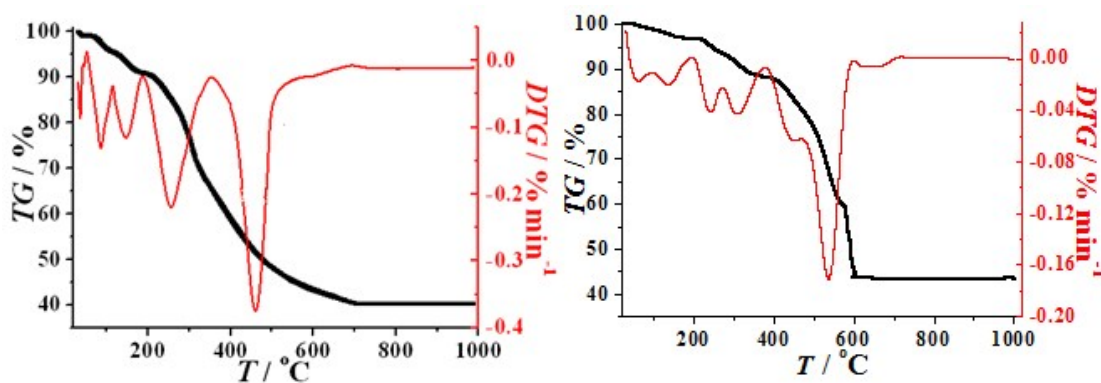

Figure S5. TG-DTG curve of complexes **1** (left) and **2** (right).

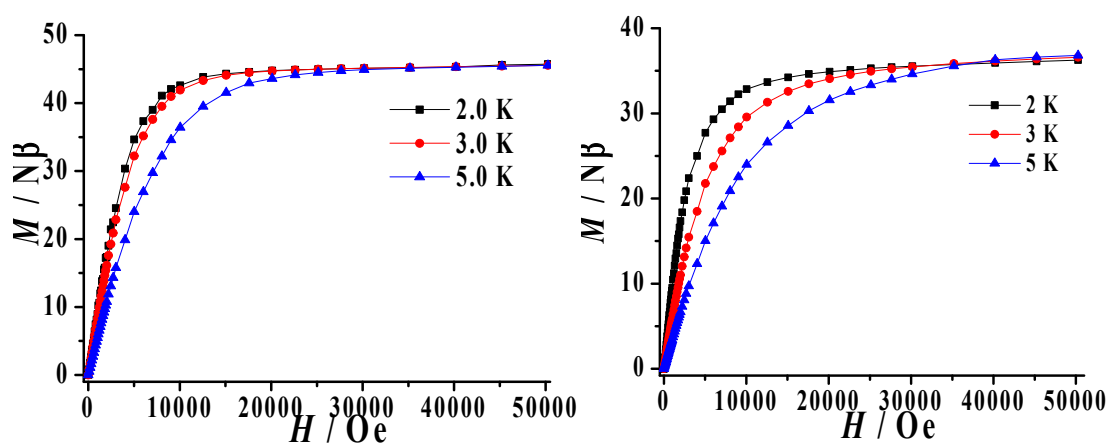

Figure S6.  $M$  vs.  $H$  plot at various temperatures for complexes **1** (left) and **2** (right).

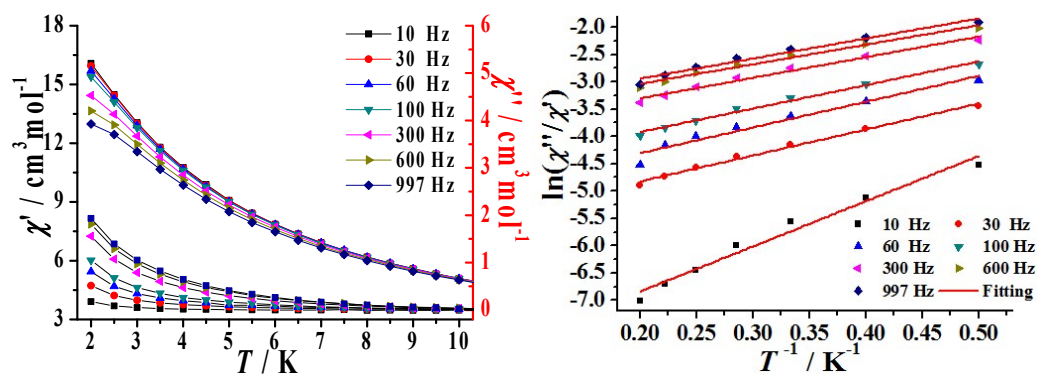

Figure S7. Temperature dependent ac susceptibility for **2** in the absence of dc field ( $H_{ac} = 2.5$  Oe) (left); Plots of  $\ln(\chi''/\chi')$  vs.  $1/T$  for **2**. The solid lines represent the fitting results over the temperature range of 2–5 K (right).

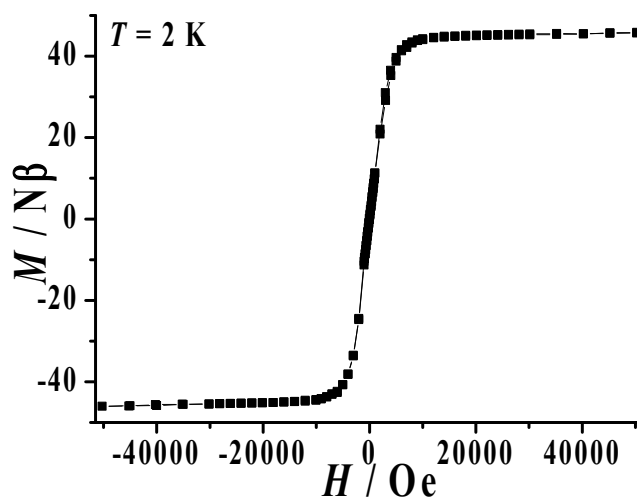

Figure S8. Magnetic hysteresis loop of **1** recorded at 2 K.

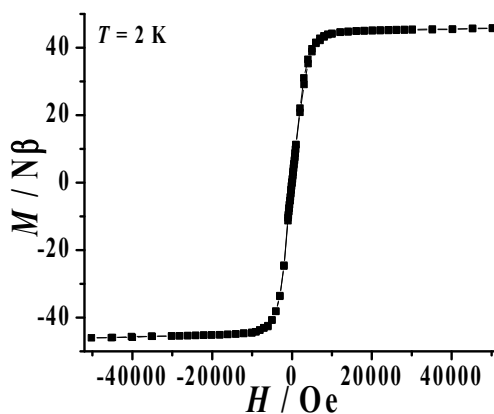

Figure S9. Temperature dependent out-of-phase ac susceptibility for **2** in the absence of a dc field ( $H_{dc} = 2.5$  Oe). Magnetic hysteresis loop of **2** recorded at 2 K.

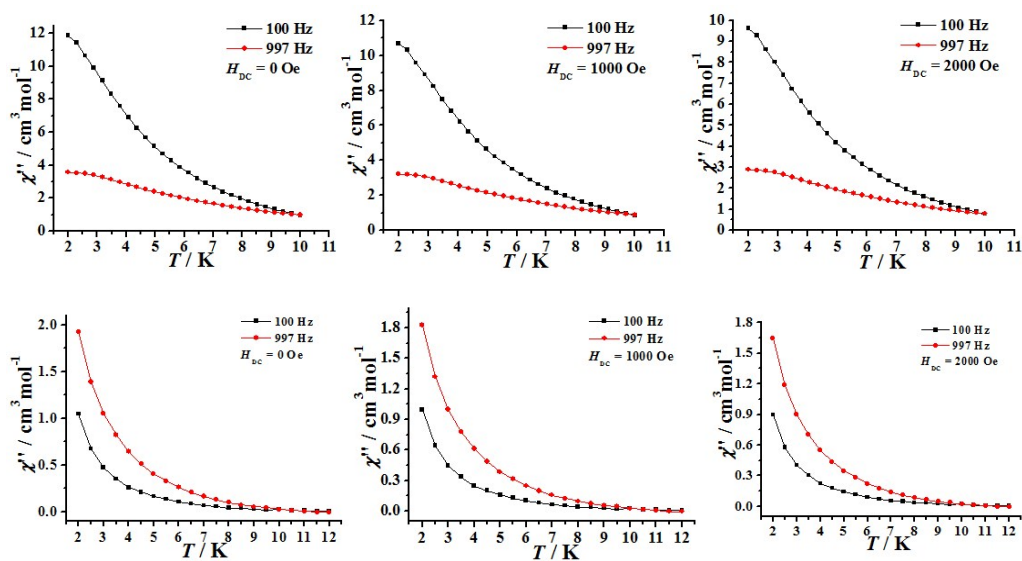

Figure S10. Temperature dependence of the out-of-phase susceptibility at 100 and 997 Hz and applied fields of 0 (left), 1000 (middle), and 2000 Oe (right) for the complexes **1** (up) and **2** (down).

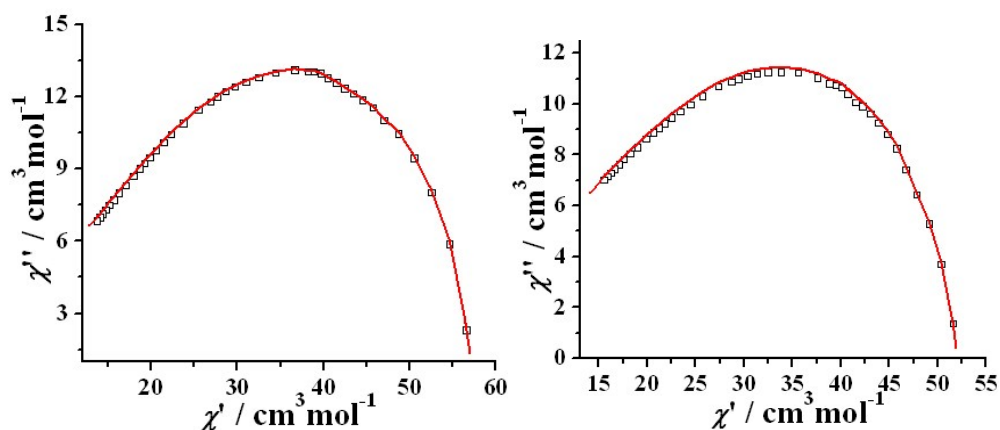

Figure S11. Cole-Cole diagram of **1-2** at 2 K with zero dc field; the solid lines are the best fits to the experimental data, obtained with the generalized Debye model.

Table S1. Details of the Data Collection and Refinement Parameters for Complexes **1-2**.

|                                                    | Complex 1                                                                                        | Complex 2                                                                       |
|----------------------------------------------------|--------------------------------------------------------------------------------------------------|---------------------------------------------------------------------------------|
| Chemical formula                                   | C <sub>86</sub> H <sub>110</sub> Dy <sub>6</sub> N <sub>10</sub> O <sub>30</sub> Cl <sub>2</sub> | C <sub>76</sub> H <sub>124</sub> Dy <sub>6</sub> N <sub>2</sub> O <sub>34</sub> |
| Formula weight                                     | 2809.75                                                                                          | 2584.78                                                                         |
| Crystal system                                     | Triclinic                                                                                        | Monoclinic                                                                      |
| Space group                                        | <i>P</i> -1 (No. 2)                                                                              | <i>P</i> 2 <sub>1</sub> /c (No. 14)                                             |
| <i>a</i> / Å                                       | 12.4846(3)                                                                                       | 13.4065(3)                                                                      |
| <i>b</i> / Å                                       | 14.5722(2)                                                                                       | 21.7010(4)                                                                      |
| <i>c</i> / Å                                       | 15.5223(2)                                                                                       | 17.9936(4)                                                                      |
| <i>α</i> / °                                       | 79.1570(10)                                                                                      | 90                                                                              |
| <i>β</i> / °                                       | 67.587(2)                                                                                        | 99.840(2)                                                                       |
| <i>γ</i> / °                                       | 69.131(2)                                                                                        | 90                                                                              |
| <i>V</i> / Å <sup>3</sup>                          | 2434.88(9)                                                                                       | 5157.95(19)                                                                     |
| <i>Z</i>                                           | 1                                                                                                | 2                                                                               |
| <i>D</i> <sub>calcd</sub> / g cm <sup>-3</sup>     | 1.916                                                                                            | 1.664                                                                           |
| <i>μ</i> / mm <sup>-1</sup>                        | 4.681                                                                                            | 4.362                                                                           |
| <i>F</i> (000)                                     | 1366                                                                                             | 2524                                                                            |
| <i>T</i> / K                                       | 153                                                                                              | 153                                                                             |
| Reflections total                                  | 16896                                                                                            | 24217                                                                           |
| Theta Min-Max [Deg]                                | 2.8, 26.0                                                                                        | 3.0, 25.1                                                                       |
| Min-Max. Resd. Dens. [e Å <sup>-3</sup> ]          | -1.39, 2.19                                                                                      | -1.13, 1.78                                                                     |
| Reflections unique                                 | 9574                                                                                             | 9168                                                                            |
| <i>R</i> <sub>int</sub>                            | 0.026                                                                                            | 0.033                                                                           |
| GOF on <i>F</i> <sup>2</sup>                       | 1.04                                                                                             | 1.18                                                                            |
| <i>R</i> <sub>1</sub> [ <i>I</i> > 2σ( <i>I</i> )] | 0.0306                                                                                           | 0.0522                                                                          |
| <i>wR</i> <sub>2</sub> (all reflections)           | 0.0729                                                                                           | 0.1257                                                                          |
| CCDC                                               | 1042130                                                                                          | 1042131                                                                         |



Table S2. Different arrangement of the six Dy ions in Dy<sub>6</sub> complexes and related information.

| Type                         | Structure                                                                           | $\Delta E/k_B$ [K]        | $\tau_0$ [s]                                   | Ref |
|------------------------------|-------------------------------------------------------------------------------------|---------------------------|------------------------------------------------|-----|
| Co-parallel,<br>not coplanar | 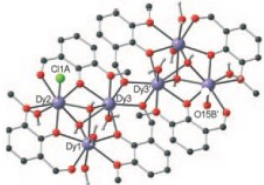   | 200                       | $15 \times 10^{-9}$                            | [1] |
| Co-parallel,<br>not coplanar |    | 46.2                      | $2.85 \times 10^{-7}$                          | [2] |
| Planar                       |    | 116<br>181                | $1.11 \times 10^{-11}$<br>$8.1 \times 10^{-9}$ | [3] |
| Planar                       |   | 27<br>98                  | $1.56 \times 10^{-6}$<br>$5.25 \times 10^{-7}$ | [4] |
| Edge-to-edge<br>arrangement  |  | 33.9<br>40.7              | $5.8 \times 10^{-8}$<br>$1.2 \times 10^{-7}$   | [5] |
| Edge-to-edge<br>arrangement  |  | no                        | no                                             | [6] |
| Hollow                       |  | no                        | no                                             | [7] |
| Hemi-cubanes                 |  | 9.7 ( $H_{dc} = 1800$ Oe) | $6.4 \times 10^{-6}$                           | [8] |



|                |                                                                                     |                                     |                                              |      |
|----------------|-------------------------------------------------------------------------------------|-------------------------------------|----------------------------------------------|------|
| Ring           | 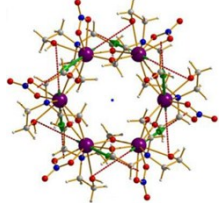   | 18.48                               | $9.47 \times 10^{-6}$                        | [9]  |
| Ring           |    | no                                  | no                                           | [10] |
| Ring           |    | 3<br>36<br>( $H_{dc} = 2000$<br>Oe) | $2.7 \times 10^{-5}$<br>$5.2 \times 10^{-8}$ | [11] |
| Trigonal prism |   | 56                                  | $6.6 \times 10^{-6}$                         | [12] |
| Trigonal prism |  | 76                                  | $1.2 \times 10^{-6}$                         | [13] |
| Wheel          |  | no                                  | no                                           | [14] |
| Wheel          |  | 12.2                                | $5.0 \times 10^{-6}$                         | [15] |
| Wheel          |  | 11.5                                | $5.1 \times 10^{-6}$                         | [15] |
| Co-parallel    |  | 9.6                                 | $2 \times 10^{-6}$                           | [16] |

|                          |                                                                                     |              |                                                |      |
|--------------------------|-------------------------------------------------------------------------------------|--------------|------------------------------------------------|------|
| Co-parallel              | 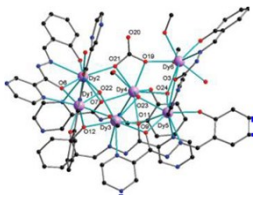   | 5.6<br>37.9  | $4.2 \times 10^{-5}$<br>$3.8 \times 10^{-6}$   | [17] |
| Vertex- and Edge-Sharing |    | 3.8          | $7.89 \times 10^{-6}$                          | [18] |
| Vertex- and Edge-Sharing |    | 85           | $3.9 \times 10^{-7}$                           | [19] |
| Vertex- and Edge-Sharing |   | 3.0          | $8.3 \times 10^{-6}$                           | [20] |
| Bowl                     |  | no           | no                                             | [21] |
| Butterfly                |  | 1.33<br>2.89 | $8.55 \times 10^{-5}$<br>$1.73 \times 10^{-5}$ | [22] |
| Sandwich-like            |  | 7.6          | $1.1 \times 10^{-6}$                           | [23] |

#### References:

- 1 I. J. Hewitt, J. Tang, N. T. Madhu, C. E. Anson, Y. Lan, J. Luzon, M. Etienne, R. Sessoli and A. K. Powell, *Angew. Chem. Int. Ed.*, 2010, **49**, 6352.
- 2 S. Das, S. Hossain, A. Dey, S. Biswas, J.-P. Sutter and V. Chandrasekhar. *Inorg. Chem.*, 2014, **53**, 5020.
- 3 X. L. Li, H. Li, D. M. Chen, C. Wang, J. Wu, Ji. Tang, W. Shi and P. Cheng, *Dalton Trans.*, 2015, **44**, 20316.
- 4 X. L. Li, J. Wu, J. Tang, B. Le Guennic, W. Shi and P. Cheng, *Chem. Commun.*, 2016, **52**, 9570.

- 5 S. Y. Lin, W. Wernsdorfer, L. Ungur, A. K. Powell, Y. N. Guo, J. Tang, L. Zhao, L. F. Chibotaru and H. J. Zhang. *Angew. Chem. Int. Ed.*, 2012, **51**, 12767.
- 6 S. Y. Lin, J. F. Wu and Z. K. Xu, *RSC Adv.*, 2017, **7**, 47520.
- 7 T. T. da Cunha, F. Pointillart, B. Le Guennic, C. L. M. Pereira, S. Golhen, O. Cador and L. Ouahab. *Inorg. Chem.*, 2013, **52**, 9711.
- 8 A. Adhikary, J. A. Sheikh, S. Biswas and S. Konar. *Dalton Trans.*, 2014, **43**, 9334.
- 9 L. Ungur, S. K. Langley, T. N. Hooper, B. Moubaraki, E. K. Brechin, K. S. Murray and L. F. Chibotaru, *J. Am. Chem. Soc.*, 2012, **134**, 18554.
- 10 A. Baniodeh, N. Magnani, S. Bräse, C. E. Anson and A. K. Powell, *Dalton Trans.*, 2015, **44**, 6343.
- 11 H. Q. Tian, M. Wang, L. Zhao, Y. N. Guo, Y. Guo, J. Tang and Z. L. Liu, *Chem. Eur. J.*, 2012, **18**, 442.
- 12 Y. N. Guo, X. H. Chen, S. F. Xue, and J. Tang, *Inorg. Chem.*, 2012, **51**, 4035.
- 13 S. K. Langley, B. Moubaraki, C. M. Forsyth, I. A. Gass and K. S. Murray. *Dalton Trans.*, 2010, **39**, 1705.
- 14 B. Joarder, S. Mukherjee, S. F. Xue, J. Tang, and S. K. Ghosh, *Inorg. Chem.*, 2014, **53**, 7554.
- 15 B. Hussain, D. Savard, T. J. Burchell, W. Wernsdorfer and M. Murugesu, *Chem. Commun.*, 2009, 1100.
- 16 H. Q. Tian, Y. N. Guo, L. Zhao, J. Tang, and Z. L. Liu, *Inorg. Chem.*, 2011, **50**, 8688.
- 17 S. K. Langley, B. Moubaraki, and K. S. Murray. *Inorg. Chem.*, 2012, **51**, 3947.
- 18 S. Mukherjee, A. K. Chaudhari, S. F. Xue, J. Tang and S. K. Ghosh, *Inorg. Chem. Commun.*, 2013, **35**, 144.
- 19 H. F. Zhang, R. Liu, J. Zhang, Y. Li, W. Liu and Y. Dong, *Chem. Asian J.*, 2017, **12**, 507.
- 20 L. J. Wu, H. Yang, S. Y. Zeng, D. C. Li and J. M. Dou, *Polyhedron.*, 2017, **129**, 77.
- 21 J. P. Costes and C. Duhayon, *Eur. J. Inorg. Chem.*, 2014, 4745.
- 22 J. P. Tong, F. Shao, M. G. Chen, Y. N. Tong, J. J. Zhuan, X. J. Xu, J. Tao and L. S. Zheng, *Inorg. Chem. Commun.*, 2016, **74**, 93.
- 23 Y. F. Bi, G. C. Xu, W. P. Liao, S. C. Du, R. P. Deng and B. W. Wang, *Sci. China. Chem.*, 2012, **55**, 967.

Table S3. Bond lengths and bond angles parameters for complex **1**.

| Bond Length (Å) |            |            |            |            |            |
|-----------------|------------|------------|------------|------------|------------|
| Dy1-O1          | 2.403(3)   | Dy2-O1     | 2.362(4)   | Dy3-O1     | 2.350(3)   |
| Dy1-O3          | 2.275(4)   | Dy2-O5     | 2.402(3)   | Dy3-O2     | 2.378(4)   |
| Dy1-O5          | 2.370(4)   | Dy2-O6     | 2.187(3)   | Dy3-O5     | 2.483(3)   |
| Dy1-N1          | 2.524(5)   | Dy2-O10    | 2.319(3)   | Dy3-O10    | 2.364(3)   |
| Dy1-O2a         | 2.366(3)   | Dy2-O11    | 2.623(4)   | Dy3-O12    | 2.257(3)   |
| Dy1-O8a         | 2.356(3)   | Dy2-O13    | 2.385(3)   | Dy3-O14    | 2.368(4)   |
| Dy1-O12a        | 2.304(4)   | Dy2-N2     | 2.465(4)   | Dy3-N3     | 2.532(5)   |
| Dy1-N4a         | 2.511(6)   | Dy2-O8a    | 2.345(3)   | Dy3-O2a    | 2.384(3)   |
| Bond Angle (°)  |            |            |            |            |            |
| O1-Dy1-O3       | 159.73(14) | O1-Dy2-O5  | 62.28(11)  | O1-Dy3-O10 | 72.02(12)  |
| O1-Dy1-O5       | 62.17(12)  | O1-Dy2-O6  | 155.25(13) | O1-Dy3-O12 | 153.83(14) |
| O1-Dy1-N1       | 127.48(15) | O1-Dy2-O10 | 72.60(13)  | O1-Dy3-O14 | 97.87(11)  |

|              |            |              |            |             |            |
|--------------|------------|--------------|------------|-------------|------------|
| O1-Dy1-O2a   | 80.25(10)  | O1-Dy2-O11   | 110.24(12) | O1-Dy3-N3   | 139.74(14) |
| O1-Dy1-O8a   | 76.91(10)  | O1-Dy2-O13   | 78.24(12)  | O1-Dy3-O2a  | 80.97(11)  |
| O1-Dy1-O12a  | 78.77(12)  | O1-Dy2-N2    | 129.43(12) | O2-Dy3-O5   | 130.09(12) |
| O1-Dy1-N4a   | 86.81(15)  | O1-Dy2-O8a   | 77.91(11)  | O2-Dy3-O10  | 138.99(10) |
| O3-Dy1-O5    | 131.69(13) | O5-Dy2-O6    | 135.69(11) | O2-Dy3-O12  | 69.34(12)  |
| O3-Dy1-N1    | 71.40(16)  | O5-Dy2-O10   | 68.74(10)  | O2-Dy3-O14  | 77.48(12)  |
| O2a-Dy1-O3   | 90.33(13)  | O5-Dy2-O11   | 129.36(11) | O2-Dy3-N3   | 133.26(13) |
| O3-Dy1-O8a   | 119.57(13) | O5-Dy2-O13   | 137.63(13) | O2-Dy3-O2a  | 69.67(11)  |
| O3-Dy1-O12a  | 81.10(13)  | O5-Dy2-N2    | 68.82(13)  | O5-Dy3-O10  | 66.68(10)  |
| O3-Dy1-N4a   | 87.85(17)  | O5-Dy2-O8a   | 71.11(11)  | O5-Dy3-O12  | 132.90(10) |
| O5-Dy1-N1    | 67.58(14)  | O6-Dy2-O10   | 126.23(13) | O5-Dy3-O14  | 138.35(11) |
| O2a-Dy1-O5   | 71.81(12)  | O6-Dy2-O11   | 72.93(12)  | O5-Dy3-N3   | 92.02(13)  |
| O5-Dy1-O8a   | 71.50(12)  | O6-Dy2-O13   | 78.74(13)  | O2a-Dy3-O5  | 69.55(11)  |
| O5-Dy1-O12a  | 128.02(11) | O6-Dy2-N2    | 73.97(13)  | O10-Dy3-O12 | 131.59(13) |
| O5-Dy1-N4a   | 135.73(15) | O6-Dy2-O8a   | 91.89(11)  | O10-Dy3-O14 | 72.76(12)  |
| O2a-Dy1-N1   | 98.28(13)  | O10-Dy2-O11  | 61.89(11)  | O10-Dy3-N3  | 69.71(13)  |
| O8a-Dy1-N1   | 73.74(12)  | O10-Dy2-O13  | 115.03(13) | O2a-Dy3-O10 | 135.59(10) |
| O12a-Dy1-N1  | 149.69(13) | O10-Dy2-N2   | 78.76(13)  | O12-Dy3-O14 | 82.18(11)  |
| N1-Dy1-N4a   | 121.94(17) | O8a-Dy2-O10  | 137.85(10) | O12-Dy3-N3  | 66.38(14)  |
| O2a-Dy1-O8a  | 142.68(13) | O11-Dy2-O13  | 76.91(13)  | O2a-Dy3-O12 | 85.02(11)  |
| O2a-Dy1-O12a | 68.77(12)  | O11-Dy2-N2   | 90.64(13)  | O14-Dy3-N3  | 82.43(14)  |
| O2a-Dy1-N4a  | 136.52(16) | O8a-Dy2-O11  | 159.53(10) | O2a-Dy3-O14 | 147.11(13) |
| O8a-Dy1-O12a | 133.14(11) | O13-Dy2-N2   | 152.33(13) | O2a-Dy3-N3  | 119.47(13) |
| O8a-Dy1-N4a  | 71.17(16)  | O8a-Dy2-O13  | 86.87(13)  | Dy2-O10-Dy3 | 101.97(14) |
| O12a-Dy1-N4a | 68.03(15)  | O8a-Dy2-N2   | 98.40(13)  | Dy2-O5-Dy3  | 96.28(10)  |
| Dy1a-O8-Dy2a | 97.00(11)  | Dy1a-O12-Dy3 | 113.28(15) | Dy2-O1-Dy3  | 101.11(15) |
| Dy1a-O2-Dy3  | 106.86(15) | Dy1-O5-Dy2   | 95.11(12)  | Dy3-O2-Dy3a | 110.33(12) |
| Dy1a-O2-Dy3a | 95.19(10)  | Dy1-O5-Dy3   | 92.52(13)  |             |            |

Table S4. Hydrogen bond lengths (Å) and angles (°) for complex 1.

| D–H···A        | <i>d</i> (D–H) | <i>d</i> (H···A) | <i>d</i> (D···A) | ∠(DHA) | Symmetry codes |
|----------------|----------------|------------------|------------------|--------|----------------|
| O1–H1···Cl1    | 0.8500         | 2.4600           | 3.281(4)         | 163.00 | -1+x, y, z     |
| O2–H2···O15    | 0.8500         | 2.0200           | 2.853(6)         | 165.00 |                |
| O13–H13A···Cl1 | 0.8500         | 2.2400           | 3.033(5)         | 156.00 | -1+x, y, z     |
| O14–H14B···O3  | 0.8500         | 1.9800           | 2.674(6)         | 138.00 | -x, -y, 1-z    |
| O14–H14B···O4  | 0.8500         | 2.4800           | 3.219(6)         | 146.00 | -x, -y, 1-z    |
| O15–H15D···Cl1 | 0.8500         | 2.2200           | 3.068(5)         | 175.00 | -1+x, y, z     |

Table S5. Bond lengths and bond angles parameters for complex 2.

| Bond Length (Å) |           |         |           |        |           |
|-----------------|-----------|---------|-----------|--------|-----------|
| Dy1-O1          | 2.414(13) | Dy2-O8  | 2.344(11) | Dy3-O2 | 2.366(11) |
| Dy1-O6          | 2.589(12) | Dy2-O9  | 2.319(11) | Dy3-O3 | 2.274(12) |
| Dy1-O12         | 2.336(11) | Dy2-O13 | 2.415(8)  | Dy3-O4 | 2.286(11) |

|                |           |               |           |              |           |
|----------------|-----------|---------------|-----------|--------------|-----------|
| Dy1-O13        | 2.407(9)  | Dy2-O16       | 2.364(9)  | Dy3-O6       | 2.358(11) |
| Dy1-O14        | 2.301(8)  | Dy2-O5a       | 2.677(11) | Dy3-O7       | 2.476(13) |
| Dy1-O15        | 2.308(9)  | Dy2-O10a      | 2.291(11) | Dy3-O11      | 2.328(11) |
| Dy1-O16        | 2.406(9)  | Dy2-O14a      | 2.499(9)  | Dy3-O13      | 2.420(9)  |
| Dy1-N1         | 2.517(12) | Dy2-O15a      | 2.265(10) | Dy3-O16      | 2.390(9)  |
| Dy1-O14a       | 2.319(9)  |               |           |              |           |
| Bond Angle (°) |           |               |           |              |           |
| O1-Dy1-O6      | 52.4(4)   | O8-Dy2-O9     | 78.9(4)   | O6-Dy3-O13   | 77.2(4)   |
| O14-Dy1-N1     | 112.9(4)  | O8-Dy2-O13    | 110.2(4)  | O6-Dy3-O16   | 75.2(4)   |
| O1-Dy1-O12     | 78.6(4)   | O8-Dy2-O16    | 75.4(3)   | O7-Dy3-O11   | 73.5(5)   |
| O14-Dy1-O14a   | 38.2(3)   | O5a-Dy2-O8    | 69.7(4)   | O7-Dy3-O13   | 135.4(4)  |
| O1-Dy1-O13     | 100.9(4)  | O8-Dy2-O10a   | 143.0(4)  | O7-Dy3-O16   | 84.4(4)   |
| O15-Dy1-O16    | 150.8(3)  | O8-Dy2-O14a   | 141.6(3)  | O11-Dy3-O13  | 119.7(4)  |
| O1-Dy1-O14     | 148.3(4)  | O8-Dy2-O15a   | 89.4(4)   | O11-Dy3-O16  | 78.4(4)   |
| O15-Dy1-N1     | 70.2(4)   | O9-Dy2-O13    | 80.6(3)   | O13-Dy3-O16  | 60.4(3)   |
| O1-Dy1-O15     | 81.9(4)   | O9-Dy2-O16    | 83.4(4)   | O2-Dy3-O3    | 73.5(4)   |
| O14a-Dy1-O15   | 83.5(3)   | O5a-Dy2-O9    | 77.2(4)   | O2-Dy3-O4    | 77.5(4)   |
| O1-Dy1-O16     | 123.2(4)  | O9-Dy2-O10a   | 144.3(4)  | O2-Dy3-O6    | 76.8(4)   |
| O16-Dy1-N1     | 127.2(3)  | O9-Dy2-O14a   | 137.6(3)  | O2-Dy3-O7    | 126.2(5)  |
| O1-Dy1-N1      | 74.4(4)   | O9-Dy2-O15a   | 138.7(4)  | O2-Dy3-O11   | 148.3(4)  |
| O14a-Dy1-O16   | 76.6(3)   | O13-Dy2-O16   | 60.9(3)   | O2-Dy3-O13   | 66.5(3)   |
| O1-Dy1-O14a    | 156.6(4)  | O5a-Dy2-O13   | 157.4(3)  | O2-Dy3-O16   | 123.9(3)  |
| O14a-Dy1-N1    | 83.6(4)   | O10a-Dy2-O13  | 94.4(3)   | O3-Dy3-O6    | 103.5(4)  |
| O6-Dy1-O12     | 76.8(4)   | O13-Dy2-O15a  | 140.0(3)  | O3-Dy3-O7    | 77.5(5)   |
| O6-Dy1-O13     | 73.2(3)   | O5a-Dy2-O16   | 136.4(3)  | O3-Dy3-O11   | 89.8(4)   |
| O6-Dy1-O14     | 141.9(3)  | O10a-Dy2-O16  | 141.6(3)  | O3-Dy3-O13   | 138.8(4)  |
| O6-Dy1-O15     | 132.6(4)  | O14a-Dy2-O16  | 74.0(3)   | O3-Dy3-O16   | 160.6(4)  |
| O6-Dy1-O16     | 70.8(3)   | O15a-Dy2-O16  | 93.2(4)   | O4-Dy3-O6    | 148.5(4)  |
| O6-Dy1-N1      | 103.6(4)  | O5a-Dy2-O10a  | 77.0(4)   | O4-Dy3-O7    | 144.1(4)  |
| O6-Dy1-O14a    | 143.7(3)  | O5a-Dy2-O14a  | 121.3(3)  | O4-Dy3-O11   | 74.7(4)   |
| O12-Dy1-O13    | 141.4(3)  | O5a-Dy2-O15a  | 61.6(4)   | O4-Dy3-O13   | 76.0(3)   |
| O12-Dy1-O14    | 79.8(3)   | O10a-Dy2-O15a | 88.9(4)   | O3-Dy3-O4    | 86.3(4)   |
| O12-Dy1-O15    | 121.1(4)  | O10a-Dy2-O14a | 70.8(3)   | O4-Dy3-O16   | 105.0(4)  |
| O12-Dy1-O16    | 87.2(3)   | O14a-Dy2-O15a | 69.8(3)   | O6-Dy3-O7    | 67.3(4)   |
| O12-Dy1-N1     | 78.2(4)   | O13-Dy2-O14a  | 73.7(3)   | O6-Dy3-O11   | 134.2(4)  |
| O12-Dy1-O14a   | 117.6(3)  | O13-Dy1-O15   | 135.1(3)  | O13-Dy1-N1   | 67.7(3)   |
| O13-Dy1-O14    | 110.5(3)  | O13-Dy1-O16   | 60.4(3)   | O13-Dy1-O14a | 77.1(3)   |
| O14-Dy1-O15    | 72.7(3)   | O14-Dy1-O16   | 78.5(3)   | Dy1-O15-Dy2a | 110.5(4)  |
| Dy1-O6-Dy3     | 94.7(4)   | Dy1-O14-Dy1a  | 141.8(4)  | Dy2-O16-Dy3  | 97.2(3)   |
| Dy1-O13-Dy2    | 95.3(3)   | Dy1-O14-Dy2a  | 102.9(3)  | Dy1-O16-Dy2  | 96.7(3)   |
| Dy1-O13-Dy3    | 97.9(3)   | Dy1a-O14-Dy2a | 95.3(3)   | Dy1-O16-Dy3  | 98.8(3)   |
| Dy2-O13-Dy3    | 95.0(3)   |               |           |              |           |
